# Supplementary material for: Identification of Novel Human Damage Response Proteins Targeted through Yeast Orthology
Source: PubMed Central journal article supplement (PMC3353887; doi:10.1371/journal.pone.0037368), 2012-05-16
Supplement: pone.0037368.s004.pdf [file pone.0037368.s004.pdf]

Table S2

| Symbol   | Name                                                                                              | Summary Function (from NCBI Entrez)                                                                                                                                                                                                                                                                                                                                                                                                                                                                                                                                                                                                                                                                                                                                                                            | Gene Ontology                                                                                                                                                                                                                                                                                                                                                    | yeast      |     |     |    |     | human 293T |     |     |   |
|----------|---------------------------------------------------------------------------------------------------|----------------------------------------------------------------------------------------------------------------------------------------------------------------------------------------------------------------------------------------------------------------------------------------------------------------------------------------------------------------------------------------------------------------------------------------------------------------------------------------------------------------------------------------------------------------------------------------------------------------------------------------------------------------------------------------------------------------------------------------------------------------------------------------------------------------|------------------------------------------------------------------------------------------------------------------------------------------------------------------------------------------------------------------------------------------------------------------------------------------------------------------------------------------------------------------|------------|-----|-----|----|-----|------------|-----|-----|---|
|          |                                                                                                   |                                                                                                                                                                                                                                                                                                                                                                                                                                                                                                                                                                                                                                                                                                                                                                                                                |                                                                                                                                                                                                                                                                                                                                                                  | homolog    | 4NQ | MMS | UV | tOH | 4NQ        | MMS | tOH |   |
| ACD      | Adrenocortical dysplasia homolog (mouse)                                                          | involved in telomere function. ACD is one of six core proteins in the telomere/shelterin telomeric complex, which functions to maintain telomere length and to protect telomere ends. Through its interaction with other components, ACD plays a key role in the assembly and stabilization of this complex, and it mediates the access of telomerase to the telomere.                                                                                                                                                                                                                                                                                                                                                                                                                                         | morphogenesis intracellular protein transport negative regulation of telomere maintenance via telomerase positive regulation of single-stranded telomeric DNA binding positive regulation of telomerase activity protection from non-homologous end joining at telomere segmentation skeletal system development telomere assembly urogenital system development | no homolog |     |     |    |     |            | 0   | -1  | 2 |
| ADK      | Adenosine kinase                                                                                  | an abundant enzyme in mammalian tissues. ADK catalyzes the transfer of the gamma-phosphate from ATP to adenosine, thereby serving as a regulator of concentrations of extracellular adenosine and intracellular adenosine. Adenosine has widespread effects on the cardiovascular, nervous, respiratory, and immune systems and inhibitors of the enzyme could play an pharmacological role in increasing intracellular adenosine concentrations and acting as anti-inflammatory agents.                                                                                                                                                                                                                                                                                                                       | adenosine kinase activity kinase activity magnesium ion binding transferase activity purine ribonucleoside salvage ribonucleoside monophosphate biosynthetic process                                                                                                                                                                                             | YJR105W    | 23  | 2   | 0  | 0   | 0          | 0   | 0   | 0 |
| ASF1B    | ASF1 anti-silencing function 1 homolog B (S. cerevisiae)                                          | a member of the H3/H4 family of histone chaperone proteins and is similar to the anti-silencing function-1 gene in yeast. The encoded protein is the substrate of the touseled-like kinase family of cell cycle-regulated kinases, and may play a key role in modulating the nucleosome structure of chromatin by ensuring a constant supply of histones at sites of nucleosome assembly.                                                                                                                                                                                                                                                                                                                                                                                                                      | histone binding cell differentiation chromatin assembly or disassembly chromatin modification multicellular organismal development nucleosome assembly regulation of transcription, DNA-dependent spermatogenesis transcription chromatin nucleus                                                                                                                | YJL115W    | 26  | 30  | 0  | 0   | 0          | 0   | 0   | 0 |
| ATP6V1D  | ATPase, H+ transporting, lysosomal 34kDa, V1 subunit D                                            | component of vacuolar ATPase (V-ATPase), a multisubunit enzyme that mediates acidification of eukaryotic intracellular organelles. V-ATPase dependent organelle acidification is necessary for such intracellular processes as protein sorting, zymogen activation, receptor-mediated endocytosis, and synaptic vesicle proton gradient generation. V-ATPase is composed of a cytosolic V1 domain and a transmembrane V0 domain. The V1 domain consists of three A and three B subunits, two G subunits plus the C, D, E, F, and H subunits. The V1 domain contains the ATP catalytic site. The V0 domain consists of five different subunits: a, c, c', c'', and d. Additional isoforms of many of the V1 and V0 subunit proteins are encoded by multiple genes or alternatively spliced transcript variants. | ATPase activity, coupled to transmembrane movement of substances protein-transporting ATPase activity, rotational mechanism ATP synthesis coupled proton transport ion transport proton transport proton-transporting two-sector ATPase complex, catalytic domain                                                                                                | YEL051W    | 30  | 18  | 0  | 9   | 0          | -2  | -1  |   |
| ATP6V1F  | ATPase, H+ transporting, lysosomal 14kDa, V1 subunit F                                            | ATPase, H+ transporting, lysosomal 14kDa, V1 subunit F                                                                                                                                                                                                                                                                                                                                                                                                                                                                                                                                                                                                                                                                                                                                                         | ATPase activity, coupled to transmembrane movement of substances protein-transporting ATPase activity, rotational mechanism ATP synthesis coupled proton transport ion transport proton transport proton-transporting two-sector ATPase complex, catalytic domain                                                                                                | YGR020C    | 22  | 7   | 6  | 2   | 0          | 1   | 1   |   |
| BCAP29   | B-cell receptor-associated protein 29                                                             | open reading frame 1                                                                                                                                                                                                                                                                                                                                                                                                                                                                                                                                                                                                                                                                                                                                                                                           | apoptosis intracellular protein transport vesicle-mediated transport endoplasmic reticulum endoplasmic reticulum membrane integral to membrane membrane                                                                                                                                                                                                          | YDL072C    | 22  | 15  | 13 | 2   | -          |     |     |   |
| C14orf1  | sterol biosynthetic process endoplasmic reticulum membrane integral to membrane transport vesicle |                                                                                                                                                                                                                                                                                                                                                                                                                                                                                                                                                                                                                                                                                                                                                                                                                |                                                                                                                                                                                                                                                                                                                                                                  | YER044C    | 26  | 30  | 9  | 16  | 0          | 0   | 2   |   |
| CDC40    | Cell division cycle 40 homolog                                                                    | essential for the catalytic step II in pre-mRNA splicing process. In the spliceosome, and contains seven WD repeats, which function in protein-protein interactions. Sequence similarity to yeast Prp17p, which functions in pre-mRNA splicing and cell cycle progression. Major protein component of the cytoplasmic face of intracellular organelles, called coated vesicles and coated pits. These specialized organelles are involved in the intracellular trafficking of receptors and endocytosis of a variety of macromolecules. The basic subunit of the clathrin coat is composed of three heavy chains and three light chains.                                                                                                                                                                       | RNA splicing nuclear mRNA splicing, via spliceosome nucleus spliceosome                                                                                                                                                                                                                                                                                          | YDR364C    | 20  | 20  | 9  | 0   | 2          | 0   | 0   |   |
| CLTC     | Clathrin, heavy chain (Hc)                                                                        |                                                                                                                                                                                                                                                                                                                                                                                                                                                                                                                                                                                                                                                                                                                                                                                                                | protein binding structural molecule activity intracellular protein transport vesicle-mediated transport clathrin coat of coated pit clathrin coat of trans-Golgi network vesicle cytoplasmic vesicle cytoplasmic vesicle membrane melanosome plasma membrane                                                                                                     | YGL206C    | 30  | 19  | 0  | 6   | 2          | 0   | 2   |   |
| CTDNEP1  | CTD nuclear envelope phosphatase 1                                                                |                                                                                                                                                                                                                                                                                                                                                                                                                                                                                                                                                                                                                                                                                                                                                                                                                | hydrolase activity protein serine/threonine phosphatase activity nuclear envelope organization protein amino acid dephosphorylation endoplasmic reticulum membrane integral to membrane nuclear membrane                                                                                                                                                         | YHR004C    | 10  | 10  | 7  | 2   | 0          | -2  | -3  |   |
| EXOSC10  | Exosome component 10                                                                              |                                                                                                                                                                                                                                                                                                                                                                                                                                                                                                                                                                                                                                                                                                                                                                                                                | 5'-5' triphosphatase activity nuclear protein binding protein serine/threonine kinase activity nuclear-transcribed mRNA catabolic process, nonsense-mediated decay nuclear exosome (RNase complex)                                                                                                                                                               | YOR001W    | 0   | 7   | 13 | 0   | 0          | 0   | 0   |   |
| FBXL2    | F-box and leucine-rich repeat protein 2                                                           | member of the F-box protein family, characterized by an approximately 40 amino acid motif, the F-box. F-box proteins constitute 1 of 4 subunits of ubiquitin protein ligase complex SCFs (SKP1-cullin-F-box), which function in phosphorylation-dep. ubiquitination. FBXL2, in addition to an F-box, contains 12 tandem leucine-rich repeats.                                                                                                                                                                                                                                                                                                                                                                                                                                                                  | protein binding ubiquitin-protein ligase activity modification-dependent protein catabolic process protein modification process proteolysis cytoplasm                                                                                                                                                                                                            | YJR090C    | 6   | 5   | 3  | 5   | 0          | -1  | 0   |   |
| HDAC6    | Histone deacetylase 6                                                                             | belongs to class II of the histone deacetylase/acuc/alpha family. It contains an internal duplication of two catalytic domains which appear to function independently of each other. This protein possesses histone deacetylase activity and represses transcription.                                                                                                                                                                                                                                                                                                                                                                                                                                                                                                                                          | actin binding hydrolase activity metal ion binding specific transcriptional repressor activity tubulin deacetylase activity zinc ion binding cell cycle chromatin modification multicellular organismal development negative regulation of microtubule depolymerization protein polyubiquitination regulation of transcription, DNA-dependent                    | YNL021W    | 12  | 5   | 0  | 2   | 0          | 0   | 0   |   |
| HSPBP1   | Hsp70-interacting protein                                                                         |                                                                                                                                                                                                                                                                                                                                                                                                                                                                                                                                                                                                                                                                                                                                                                                                                | enzyme inhibitor activity protein binding protein folding                                                                                                                                                                                                                                                                                                        | YBR101C    | 14  | 16  | 24 | 8   | 2          | 0   | 3   |   |
| LSM1     | LSM1 homolog, U6 small nuclear RNA associated (S. cerevisiae)                                     | Sm-like proteins were identified in a variety of organisms based on sequence homology with the Sm protein family. Sm-like proteins contain the Sm sequence motif, which consists of 2 regions separated by a linker of variable length that folds as a loop. The Sm-like proteins are thought to form a stable heteromer present in tri-snRNP particles, which are important for pre-mRNA splicing.                                                                                                                                                                                                                                                                                                                                                                                                            | RNA binding RNA splicing factor activity, transesterification mechanism protein binding RNA splicing mRNA processing cytoplasm nucleus ribonucleoprotein complex                                                                                                                                                                                                 | YJL124C    | 30  | 18  | 0  | 0   | 0          | -1  | 0   |   |
| MED31    | Mediator complex subunit 31                                                                       |                                                                                                                                                                                                                                                                                                                                                                                                                                                                                                                                                                                                                                                                                                                                                                                                                | RNA polymerase II transcription mediator activity protein binding regulation of transcription, DNA-dependent mediator complex nucleus                                                                                                                                                                                                                            | YGL127C    | 7   | 7   | 0  | 0   | -          |     |     |   |
| NCBP2    | Nuclear cap binding protein subunit 2, 20kDa                                                      | component of the nuclear cap-binding protein complex (CBC), which binds to the monomethylated 5' cap of nascent pre-mRNA in the nucleoplasm. NCBP2 has an RNP domain commonly found in RNA binding proteins, and contains the cap-binding activity. The CBC promotes pre-mRNA splicing, 3'-end processing, RNA nuclear export, and nonsense-mediated mRNA decay.                                                                                                                                                                                                                                                                                                                                                                                                                                               | RNA cap binding nucleotide binding protein binding RNA splicing mRNA transport positive regulation of RNA export from nucleus snRNA export from nucleus snRNA export from nucleus spliceosomal snRNP biogenesis transport cytosol mRNA cap binding complex nucleoplasm nucleus nucleus                                                                           | YPL178W    | 12  | 7   | 0  | 0   | 0          | 0   | 0   |   |
| PEX10    | Peroxisome biogenesis factor 10                                                                   | involved in import of peroxisomal matrix proteins. This protein localizes to the peroxisomal membrane. Mutations in this gene result in phenotypes within the Zellweger spectrum of peroxisomal biogenesis disorders, ranging from neonatal adrenoleukodystrophy to Zellweger syndrome.                                                                                                                                                                                                                                                                                                                                                                                                                                                                                                                        | metal ion binding protein binding zinc ion binding peroxisome organization protein import into peroxisome matrix membrane peroxisomal membrane peroxisome                                                                                                                                                                                                        | YDR265W    | 0   | 12  | 0  | 0   | 0          | 0   | 2   |   |
| PFDN5    | Prefoldin subunit 5                                                                               | member of the prefoldin alpha subunit family. PFDN5 is one of six subunits of prefoldin, a molecular chaperone complex that binds and stabilizes newly synthesized polypeptides, allowing them to fold correctly. The complex, consisting of two alpha and four beta subunits, forms a double beta barrel assembly with six protruding coiled-coils. The encoded protein may also repress the transcriptional activity of the proto-oncogene c-Myc.                                                                                                                                                                                                                                                                                                                                                            | transcription corepressor activity unfolded protein binding protein folding regulation of transcription, DNA-dependent cytoplasm cytoskeleton nucleus prefoldin complex                                                                                                                                                                                          | YML094W    | 26  | 18  | 0  | 0   | -1         | -1  | 0   |   |
| POLR2D   | Polymerase (RNA) II (DNA directed) polypeptide D                                                  | fourth largest subunit of RNA polymerase II, the polymerase responsible for synthesizing messenger RNA in eukaryotes. In yeast, this polymerase subunit is associated with the polymerase under suboptimal growth conditions and may have a stress protective role. A sequence for a ribosomal pseudogene is contained within the 3' untranslated region of the transcript from this gene.                                                                                                                                                                                                                                                                                                                                                                                                                     | DNA-directed RNA polymerase activity catalytic activity nucleotide binding RNA elongation from RNA polymerase II promoter cellular metabolic process nuclear mRNA splicing, via spliceosome transcription transcription initiation from RNA polymerase II promoter DNA-directed RNA polymerase II, core complex nucleoplasm nucleus                              | YJL140W    | 23  | 22  | 8  | 4   | 2          | -1  | 2   |   |
| POT1     | POT1 protection of telomeres 1 homolog (S. pombe)                                                 | a member of the telomelin family and is involved in telomere maintenance. POT1 functions as a member of a multi-protein complex that binds to the TTAGGG repeats of telomeres, regulating telomere length and protecting chromosome ends from recombination, chromosome instability, and abnormal chromosome segregation. Increased transcriptional expression associated with stomach carcinogenesis and its progression.                                                                                                                                                                                                                                                                                                                                                                                     | DEAD/H-box RNA helicase binding DNA binding protein binding single-stranded telomeric DNA binding telomerase inhibitor activity DNA duplex unwinding negative regulation of telomere maintenance via telomerase positive regulation of DNA strand elongation positive regulation of helicase activity positive regulation of telomerase activity                 | no homolog |     |     |    |     | 0          | -1  | 1   |   |
| PRPS2    | Phosphoribosyl pyrophosphate synthetase 2                                                         |                                                                                                                                                                                                                                                                                                                                                                                                                                                                                                                                                                                                                                                                                                                                                                                                                | kinase activity magnesium ion binding ribose phosphate diphosphokinase activity transferase activity cellular biosynthetic process nucleobase, nucleoside, nucleotide and nucleic acid metabolic process nucleoside metabolic process nucleotide biosynthetic process ribonucleoside monophosphate biosynthetic process                                          | YHL011C    | 10  | 4   | 8  | 3   | 0          | 0   | 0   |   |
| RNASEH2A | Ribonuclease H2, subunit A                                                                        | Of the multiple RNases H in mammals, RNase H1 is the major enzyme and shows increased activity during DNA replication. It shows more homology to the RNase H1 of Escherichia coli.                                                                                                                                                                                                                                                                                                                                                                                                                                                                                                                                                                                                                             | RNA binding endonuclease activity hydrolase activity metal ion binding ribonuclease H activity ribonuclease activity DNA replication RNA catabolic process nucleus                                                                                                                                                                                               | YNL072W    | 8   | 5   | 0  | 0   | 0          | 1   | 1   |   |
| RNF20    | Ring finger protein 20                                                                            | Ring finger protein 20                                                                                                                                                                                                                                                                                                                                                                                                                                                                                                                                                                                                                                                                                                                                                                                         | ligase activity protein binding zinc ion binding chromatin modification modification-dependent protein catabolic process                                                                                                                                                                                                                                         | YDL074C    | 30  | 15  | 0  | 0   | 2          | 0   | 2   |   |
| SACM1L   | SAC1 suppressor of actin mutations 1-like                                                         |                                                                                                                                                                                                                                                                                                                                                                                                                                                                                                                                                                                                                                                                                                                                                                                                                | hydrolase activity phosphatase activity biological process Golgi apparatus endoplasmic reticulum endoplasmic reticulum membrane integral to membrane membrane                                                                                                                                                                                                    | YKL212W    | 30  | 4   | 2  | 7   | 2          | 2   | 3   |   |
| SC5DL    | Sterol-C5-desaturase-like                                                                         | enzyme of cholesterol biosynthesis. SC5DL catalyzes the conversion of lathosterol into 7-dehydrocholesterol. Mutations have been associated with lathosterolosis.                                                                                                                                                                                                                                                                                                                                                                                                                                                                                                                                                                                                                                              | C5 sterol desaturase activity iron ion binding nitrosyl oxidase activity oxidoreductase activity fatty acid biosynthetic process oxidation reduction sterol biosynthetic process endoplasmic reticulum endoplasmic reticulum membrane                                                                                                                            | YLR056W    | 24  | 11  | 6  | 8   | 0          | 0   | 2   |   |

|                |                                                                                 |                                                                                                                                                                                                                                                                                                                                                                                                                                                                                                                                                                                                                                                             |                                                                                                                                                                                                                                                                                                                                                                                                                                                                                                                                                                                                                                                |            |    |    |    |    |    |    |   |
|----------------|---------------------------------------------------------------------------------|-------------------------------------------------------------------------------------------------------------------------------------------------------------------------------------------------------------------------------------------------------------------------------------------------------------------------------------------------------------------------------------------------------------------------------------------------------------------------------------------------------------------------------------------------------------------------------------------------------------------------------------------------------------|------------------------------------------------------------------------------------------------------------------------------------------------------------------------------------------------------------------------------------------------------------------------------------------------------------------------------------------------------------------------------------------------------------------------------------------------------------------------------------------------------------------------------------------------------------------------------------------------------------------------------------------------|------------|----|----|----|----|----|----|---|
| <b>SIN3A</b>   | A, transcription regulator (yeast)                                              | transcriptional regulatory protein. It contains paired amphipathic helix (PAH) domains, which are important for protein-protein interactions and may mediate repression by the Mad-Max complex.                                                                                                                                                                                                                                                                                                                                                                                                                                                             | DNA binding transcription corepressor activity transcription factor binding negative regulation of transcription from RNA polymerase II promoter transcription kinetochore nucleus                                                                                                                                                                                                                                                                                                                                                                                                                                                             | YOL004W    | 26 | 10 | 0  | 0  | 2  | 0  | 2 |
| <b>SNF8</b>    | SNF8, ESCRT-II complex subunit, homolog                                         | SNF8, VPS25, and VPS36 form ESCRT-II (endosomal sorting complex required for transport II), a complex involved in endocytosis of ubiquitinated membrane proteins. SNF8, VPS25, and VPS36 are also associated in a multiprotein complex with RNA polymerase II elongation factor.                                                                                                                                                                                                                                                                                                                                                                            | RNA polymerase II transcription factor activity protein transport regulation of transcription from RNA polymerase II promoter transcription cytoplasm nucleus                                                                                                                                                                                                                                                                                                                                                                                                                                                                                  | YPL002C    | 0  | 26 | 0  | 2  | 0  | 0  | 0 |
| <b>STX12</b>   | Syntaxin 12                                                                     |                                                                                                                                                                                                                                                                                                                                                                                                                                                                                                                                                                                                                                                             | SNAP receptor activity cholesterol efflux intracellular protein transport protein stabilization vesicle-mediated transport Golgi apparatus integral to membrane membrane membrane raft phagocytic vesicle                                                                                                                                                                                                                                                                                                                                                                                                                                      | YOR036W    | 0  | 5  | 5  | 2  | 1  | 0  | 1 |
| <b>TADA2L</b>  | Transcriptional adaptor 2-like                                                  | transcriptional activator adaptor and has been found to be part of the PCAF histone acetylase complex. Many activator proteins enhance the initiation rate of RNA polymerase II-mediated transcription by interacting with general transcription machinery bound at promoter. Adaptor proteins are usually required to acetylate and destabilize nucleosomes, thereby relieving chromatin constraints at the promoter.                                                                                                                                                                                                                                      | transcription cofactor activity transcription factor activity zinc ion binding regulation of transcription, DNA-dependent transcription from RNA polymerase II promoter chromosome nucleus                                                                                                                                                                                                                                                                                                                                                                                                                                                     | YDR448W    | 0  | 4  | 6  | 0  | -2 | 1  | 0 |
| <b>TBL1XR1</b> | Transducin (beta)-like 1 X-linked receptor 1                                    | sequence similarity with members of the WD40 repeat-containing protein family. The WD40 group is a large family of proteins with regulatory function. WD40 repeats mediate protein-protein interactions and members of the family are involved in signal transduction, RNA processing, gene regulation, vesicular trafficking, cytoskeletal assembly and possibly control of cytotypic                                                                                                                                                                                                                                                                      | chromatin modification modification-dependent protein catabolic process regulation of transcription, DNA-dependent transcription nucleus                                                                                                                                                                                                                                                                                                                                                                                                                                                                                                       | YBR103W    | 0  | 12 | 0  | 2  | 0  | 1  | 0 |
| <b>TERF1</b>   | Telomeric repeat binding factor (NIMA-interacting) 1                            | telomere specific protein which is a component of the telomere nucleoprotein complex. This protein is present at telomeres throughout the cell cycle and functions as an inhibitor of telomerase, acting in cis to limit the elongation of individual chromosome ends. The protein structure contains a C-terminal Myb motif, a dimerization domain near its N-terminus and an acidic N-terminus.                                                                                                                                                                                                                                                           | DNA bending activity double-stranded telomeric DNA binding protein homodimerization activity telomerase inhibitor activity cell cycle cell division mitosis negative regulation of telomere maintenance via semi-conservative replication negative regulation of telomere maintenance via telomerase regulation of transcription telomere maintenance via telomere shortening spindle                                                                                                                                                                                                                                                          | no homolog |    |    |    |    | 0  | -1 | 1 |
| <b>TERF2</b>   | Telomeric repeat binding factor 2                                               | telomere specific protein, TERF2, which is a component of the telomere nucleoprotein complex. This protein is present at telomeres in metaphase of the cell cycle, is a second negative regulator of telomere length and plays a key role in the protective activity of telomeres. While having similar telomere binding activity and domain organization, TERF2 differs from TERF1 in that its N terminus is basic rather than acidic.                                                                                                                                                                                                                     | double-stranded telomeric DNA binding age-dependent telomere shortening cell cycle in utero embryonic development negative regulation of telomere maintenance via semi-conservative replication positive regulation of telomere maintenance protection from non-homologous end joining at telomere regulation of transcription senescence telomere maintenance via telomerase telomeric loop formation Golgi apparatus Me11 complex male germ cell nucleus                                                                                                                                                                                     | no homolog |    |    |    |    | -1 | -2 | 2 |
| <b>TMLHE</b>   | Trimethyllysine hydroxylase, epsilon                                            |                                                                                                                                                                                                                                                                                                                                                                                                                                                                                                                                                                                                                                                             | L-ascorbic acid binding electron carrier activity iron ion binding oxidoreductase activity oxidoreductase activity, acting on single donors with incorporation of molecular oxygen, incorporation of two atoms of oxygen trimethyllysine dioxygenase activity carnitine biosynthetic process oxidation reduction mitochondrial matrix mitochondrial matrix mitochondrion                                                                                                                                                                                                                                                                       | YHL021C    | 7  | 7  | 3  | 2  | 2  | 0  | 2 |
| <b>TOP3A</b>   | Topoisomerase (DNA) III alpha                                                   | a DNA topoisomerase, an enzyme that controls and alters the topologic states of DNA during transcription. TOP3A catalyzes the transient breaking and rejoining of a single strand of DNA which allows the strands to pass through one another, thus reducing the number of supercoils and altering the topology of DNA. This enzyme forms a complex with BLM which functions in the regulation of recombination in somatic cells.                                                                                                                                                                                                                           | DNA topoisomerase type I activity metal ion binding protein binding zinc ion binding DNA topological change DNA unwinding during replication meiosis PML body chromosome nucleus                                                                                                                                                                                                                                                                                                                                                                                                                                                               | YLR234W    | 30 | 30 | 9  | 0  | 2  | 0  | 2 |
| <b>TSG101</b>  | Tumor susceptibility gene 101                                                   | belongs to a group of apparently inactive homologs of ubiquitin-conjugating enzymes. TSG101 contains a coiled-coil domain that interacts with stathmin, a cytosolic phosphoprotein implicated in tumorigenesis. TSG101 may play a role in cell growth and differentiation and act as a negative growth regulator. In vitro steady-state expression of this tumor susceptibility gene appears to be important for maintenance of genomic stability and cell cycle regulation. Mutations and alternative splicing in this gene occur in high frequency in breast cancer and suggest that defects occur during breast cancer tumorigenesis and/or progression. | DNA binding protein binding small conjugating protein ligase activity transcription corepressor activity ubiquitin binding cell cycle arrest interspecies interaction between organisms keratinocyte differentiation negative regulation of cell proliferation negative regulation of transcription, DNA-dependent non-lytic virus budding post-translational protein modification protein transport regulation of cell growth regulation of protein metabolic process ubiquitin-dependent protein catabolic process via the multivesicular body sorting pathway cytoplasm late endosome membrane multivesicular body nucleolus nucleus plasma | YCL008C    | 0  | 22 | 0  | 7  | 0  | 0  | 0 |
| <b>TTF2</b>    | Transcription termination factor, RNA polymerase II                             | a member of the SWI2/SNF2 family of proteins, which play a critical role in altering protein-DNA interactions. TTF2 has dsDNA-dependent ATPase activity and RNA polymerase II termination activity. TTF2 interacts with cell division cycle 5-like, associates with human splicing complexes, and plays a role in pre-mRNA splicing.                                                                                                                                                                                                                                                                                                                        | ATP-dependent helicase activity DNA-dependent ATPase activity RNA polymerase II transcription termination factor hydrolase activity nucleotide binding zinc ion binding RNA splicing transcription transcription elongation factor complex                                                                                                                                                                                                                                                                                                                                                                                                     | YLR032W    | 30 | 30 | 25 | 0  | 0  | 0  | 0 |
| <b>VPS16A</b>  | Vacuolar protein sorting 16 homolog A                                           | vesicle mediated protein sorting plays an important role in segregation of intracellular molecules into distinct organelles. The mammalian class C Vps proteins are predominantly associated with late endosomes/lysosomes and may mediate vesicle trafficking steps in the endosome/lysosome pathway.                                                                                                                                                                                                                                                                                                                                                      | intracellular protein transport, endosome, late endosome, lysosomal membrane                                                                                                                                                                                                                                                                                                                                                                                                                                                                                                                                                                   | YPL045W    | 21 | 15 | 0  | 13 | 0  | -2 | 0 |
| <b>XPA</b>     | Xeroderma pigmentosum, complementation group A                                  | a zinc finger protein involved in DNA excision repair. XPA is part of the NER (nucleotide excision repair) complex which is responsible for repair of UV radiation-induced photoproducts and DNA adducts induced by chemical carcinogens. Mutations in this gene are associated with xeroderma pigmentosum complementation group A.                                                                                                                                                                                                                                                                                                                         | damaged DNA binding metal ion binding nucleotide binding protein domain specific binding protein homodimerization activity zinc ion binding nucleotide-excision repair, DNA damage removal response to DNA damage stimulus nucleoplasm nucleus                                                                                                                                                                                                                                                                                                                                                                                                 | YMR201C    | 29 | 7  | 22 | 0  | -3 | 0  | 0 |
| <b>ZFYVE20</b> | Zinc finger, FYVE domain containing 20                                          |                                                                                                                                                                                                                                                                                                                                                                                                                                                                                                                                                                                                                                                             | early endosome membrane, endosome transport, protein transport, plasma membrane                                                                                                                                                                                                                                                                                                                                                                                                                                                                                                                                                                | YDR323C    | 26 | 10 | 4  | 2  | 3  | 2  | 3 |
| <b>SLC25A5</b> | Solute carrier family 25 (mitochondrial carrier; adenine translocator) member 5 | ADP/ATP translocase, the most abundant mitochondrial protein, is an integral component of the inner mitochondrial membrane. It facilitates exchange of ADP and ATP between the cytosol and the mitochondria, thereby linking the subcellular compartment of ATP production to those of ATP utilization. SLC25A5 is 1 of at least 3 transcriptionally active ADP/ATP translocase genes in humans.                                                                                                                                                                                                                                                            | adenine transmembrane transporter activity binding transporter activity interspecies interaction between organisms transport integral to plasma membrane membrane mitochondrial inner membrane mitochondrial inner membrane mitochondrial nucleoid mitochondrion                                                                                                                                                                                                                                                                                                                                                                               | YBR085W    | 0  | 0  | 0  | 0  |    |    |   |
| <b>AP3D1</b>   | Adaptor-related protein complex 3, delta 1 subunit                              | AP3D1 is a subunit of the AP3 adaptor-like complex, which is not associated with clathrin. The AP3D1 subunit is implicated in intracellular biogenesis and trafficking of pigment granules and possibly platelet dense granules and neurotransmitter vesicles.                                                                                                                                                                                                                                                                                                                                                                                              | protein binding protein transporter activity transporter activity eye pigment biosynthetic process intracellular protein transport vesicle-mediated transport Golgi apparatus Golgi membrane membrane membrane coat                                                                                                                                                                                                                                                                                                                                                                                                                            | YPL195W    | 0  | 0  | 0  | 0  |    |    |   |
| <b>ADIPOR1</b> | Adiponectin receptor 1                                                          | length adiponectin and mediate increased AMPK and PPAR-alpha ligand activities, as well as fatty acid oxidation and glucose uptake by adiponectin.                                                                                                                                                                                                                                                                                                                                                                                                                                                                                                          | hormone binding receptor activity fatty acid oxidation hormone-mediated signaling lipid metabolic process integral to membrane membrane                                                                                                                                                                                                                                                                                                                                                                                                                                                                                                        | YDR492W    | 0  | 0  | 0  | 0  |    |    |   |
| <b>URM1</b>    | related modifier 1 homolog                                                      |                                                                                                                                                                                                                                                                                                                                                                                                                                                                                                                                                                                                                                                             | modification-dependent protein catabolic process                                                                                                                                                                                                                                                                                                                                                                                                                                                                                                                                                                                               | YIL008W    | 0  | 0  | 0  | 0  |    |    |   |
| <b>RASA1</b>   | RAS p21 protein activator 1                                                     | part of the GAP1 family of GTPase-activating proteins. RASA1 stimulates the GTPase activity of normal RAS p21 but not its oncogenic counterpart. This suppressor of RAS function enhances the weak GTPase activity of RAS proteins resulting in the inactive GDP-bound form of RAS, thereby allowing control of cellular proliferation and differentiation. Mutations leading to changes in the binding sites are associated with basal cell carcinomas.                                                                                                                                                                                                    | binding cytokinesis embryonic development intracellular signaling cascade negative regulation of cell adhesion negative regulation of cell-matrix adhesion negative regulation of neuron apoptosis regulation of RNA metabolic process regulation of actin filament polymerization regulation of cell shape regulation of small GTPase mediated signal transduction vasculogenesis plasma membrane ruffle                                                                                                                                                                                                                                      | YKL092C    | 0  | 0  | 0  | 0  |    |    |   |

Yeast sensitivity scores from Begley et al, Mol. Cell. 2004

20-30 high sensitivity 1-3 resistant  
2-19 low-medium sensitivity -3- -1 sensitive
