# Supplementary material for: Identification of Novel Human Damage Response Proteins Targeted through Yeast Orthology
Source: PubMed Central journal article supplement (PMC3353887; doi:10.1371/journal.pone.0037368), 2012-05-16
Supplement: pone.0037368.s005.pdf [file pone.0037368.s005.pdf]

**Table S3**

| symbol    | Identifier   | Entrez  | Open Biosystems  | oligo ID     | PCR primer sequence      |                           | code<br>(293T) | 293T KD<br>efficiency | code<br>(TK6) | TK6 KD<br>efficiency |
|-----------|--------------|---------|------------------|--------------|--------------------------|---------------------------|----------------|-----------------------|---------------|----------------------|
|           |              | Gene Id | catalog number   |              | left                     | PCR primer sequence left  |                |                       |               |                      |
| ACD       | NM_022914    | 65057   | RHS4430-98524277 | V2LHS_116356 | ccctgctgtctggtggaac      | atgagctggggggaagc         | 42.1           | 0.0816                | 42.2          | 0.7169               |
| ADIPOR1   | NM_00112768  | 51094   | RHS4430-98714358 | V2LHS_134726 | cgacgaacgtctctacc        | gtccagttgtctctaaactcc     | 47.1           | 0.44288               |               |                      |
| ADK       | NM_006721    | 132     | RHS4430-99329088 | V2LHS_1191   | gctgcatgcatcatcgtt       | tctccagatcaagatgttttcc    | 19.3           | 0.25525               |               |                      |
| AP3D1     | NM_001077523 | 8943    | RHS4430-98485767 | V2LHS_47150  | gctgaccacaatcagatcc      | agaccgctcagtgcaacac       | 46.2           | 1                     |               |                      |
| ASF1B     | NM_018154    | 55723   | RHS4430-99142050 | V2LHS_156005 | accctgagctgctgaga        | tcgaggccaagatgttcc        | 28.1           | 0.1875                | 28.6          | 0.2449               |
| ATP6V1D   | NM_015994    | 51382   | RHS4430-98852136 | V2LHS_134703 | ttttactagctgaagcaagtt    | gcgctttatgacatttggat      | 4.7            | 0.3597                | 4.1           | 0.19                 |
| ATP6V1D   | NM_015994    | 51382   | RHS4430-98853811 | V2LHS_134698 | ttttactagctgaagcaagtt    | gcgctttatgacatttggat      | 51.3           | 0.1678                |               |                      |
| ATP6V1F   | NM_004231    | 9296    | RHS4430-98843664 | V2LHS_28381  | gaaccgcatcccaatt         | caatgtcatcccgtttagaa      | 7.7            | 0.01                  | 7.7           | 0.32                 |
| BCAP29    | NM_018844    | 55973   | RHS4430-98852036 | V2LHS_21873  | ctgcctacctttttctctc      | ttgcaattttaccagagaca      | 23             | 0.65067               | 23.5          | 0.4601               |
| C14ORF1   | NM_007176    | 11161   | RHS4430-98521091 | V2LHS_207531 | tgccattgacattcaaca       | gacaacaactcagagaggaaatg   | 36.1           | 0.46652               |               |                      |
| CDC40     | NM_015891    | 51362   | RHS4430-98853717 | V2LHS_227739 | tctctagcagtgccagtgga     | gggtcaaggtgaactccagtc     | 11.2           | 0.01105               |               |                      |
| CLTC      | NM_004859    | 1213    | RHS4430-98705117 | V2LHS_67882  | tggttgataaccagggttct     | ccagattctgccaattcgtt      | 5.7            | 0.0431                |               |                      |
| DULLARD   | NM_015343    | 23399   | RHS4430-98820118 | V2LHS_74456  | gatggggatggcattgtct      | actttggagttggcgagcta      | 31.2           | 0.0205                | 31.2          | 0.695                |
| DULLARD   | NM_015343    | 23399   | RHS4430-99329001 | V2LHS_74457  | gatggggatggcattgtct      | actttggagttggcgagcta      |                |                       |               |                      |
| EXOSC10   | NM_001001998 | 5394    | RHS4430-98714946 | V2LHS_170175 | gaagttcgatccatcaacca     | ttgacagctcttttagactcttttg | 18.6           | 0.1843                | 18.3          | 0.2466               |
| FBXL2     | NM_012157    | 25827   | RHS4430-98910869 | V2LHS_202584 | ggtaccgtgcaggcatc        | aagtaggcgtgagcttgaca      | 30.2           | 0.333                 |               |                      |
| HDAC6     | NM_006044    | 10013   | RHS4430-98912627 | V2LHS_71189  | agttcaccttcgaccaggac     | gccagaacctaccctgctc       | 35.3           | 1                     |               |                      |
| HSPBP1    | NM_012267    | 23640   | RHS4430-98526302 | V2LHS_240240 | ccctcttgccatctcct        | aacacagagaagccctccag      | 38.1           | 0.05256               |               |                      |
| LSM1      | NM_014462    | 27257   | RHS4430-98851667 | V2LHS_197725 | ttctcggagggattttgtg      | ctggaggggtgtgctactc       | 15.2           | 0.2382                | 15.4          | 0.0951               |
| MED31     | NM_016060    | 40577   | RHS4430-98819243 | V2LHS_97357  | aaagaccagaatgccaagt      | aatttcgacactgagcattc      | 22             | 0.97                  |               |                      |
| NCPB2     | NM_007362    | 22916   | RHS4430-99139143 | V2LHS_85841  | taaaggaggcaggcaatc       | tctgtgccagtttccatagc      | 14.7           | 0.3523                |               |                      |
| PEX10     | NM_002617    | 5192    | RHS4430-99160793 | V2LHS_169849 | ctgctctcagatgtggccta     | ccacctggatgatgtgac        | 21.1           | 0.1146                |               |                      |
| PFDN5     | NM_002624    | 5204    | RHS4430-98715886 | V2LHS_169886 | cagatggagaaatccaaccag    | ttctgactcatcttccatgac     | 20.3           | 0.09539               |               |                      |
| POLR2D    | NM_004805    | 5433    | RHS4430-99138856 | V2LHS_68896  | tccaaggctctaacc          | ttcataagtttgagttggctgt    | 27.1           | 0.426317              |               | 0.1330/1             |
| POLR2D    | NM_004805    | 5433    | RHS4430-98895913 | V2LHS_68893  | tccaaggctctaacc          | ttcataagtttgagttggctgt    | 53.2           | 0.4414                |               |                      |
| POT1      | NM_015450    | 25913   | RHS4430-98853211 | V2LHS_96575  | aatggagatattgtcgtttca    | ttgtgataacctgagctctct     | 43.1           | 0.3829                |               |                      |
| PRPS2     | NM_002765    | 5634    | RHS4430-98820785 | V2LHS_170588 | ggtcacgaagaagtcagca      | atctccccctcacgcttt        | 17.3           | 0.13167               | 17.3          | 0.5529               |
| RASA1     | NM_002890    | 5921    | RHS4430-98704453 | V2LHS_149857 | gaggaagaggtggccatacc     | tctgtcaagtttccgtgatacc    | 49.1           | 0.368509              |               |                      |
| RNASEH2A  | NM_006397    | 10535   | RHS4430-98901475 | V2LHS_196963 | cccagttgtccgggtca        | gattctcggatgtgagctcc      | 26.1           | 0.6329                | 26.2          | 0.7071               |
| RNF20     | NM_019592    | 56254   | RHS4430-98486410 | V2LHS_52294  | aggggtgagagctggaatct     | ctccagctgctctttatttcc     | 16.5           | 0.2059                | 16.6          | 0.34032              |
| SACM1L    | NM_014016    | 22908   | RHS4430-98708493 | V2LHS_60317  | aagtgtccaagggactgga      | tgaaaaggcaacaacatga       | 29.9           | 0.3242                |               |                      |
| SC5DL     | NM_006918    | 6309    | RHS4430-98484748 | V2LHS_94843  | gacagtttgagagcagtg       | cacggagtagaagatccatcac    | 37.1           | 0.3253                | 37.1          | 0.5415               |
| SIN3A     | NM_015477    | 25942   | RHS4430-99160346 | V2LHS_96678  | acagaagaggagaattcgatg    | cgctccagctagtctgacc       | 10.2           | 0.1534                | 10.2          | 0.7684               |
| SLC25A5   | NM_001152    | 292     | RHS4430-98894996 | V2LHS_94497  | ggcaacagcagtgacagct      | ctaccgagccgctacttc        | 45.2           | 0.02855               |               |                      |
| SNF8      | NM_007241    | 11267   | RHS4430-98852714 | V2LHS_197270 | tgagctcaatattgatcacacc   | actgacagctcacgtgacattc    | 12.2           | 0.1476                |               |                      |
| STX12     | NM_177424    | 23673   | RHS4430-98851408 | V2LHS_207565 | tctgcagaagagagcacaaga    | gttccactctcatggctg        | 8.8            | 0.3427                | 8.6           | 0.49                 |
| TADA2L    | NM_133439    | 6871    | RHS4430-98817870 | V2LHS_131912 | gcagaggaagcaaaaactgc     | ggggagggatcatctgtagagt    | 9.1            | 0.08657               | 9.1           | 0.3882               |
| TADA2L    | NM_133439    | 6871    | RHS4430-98902137 | V2LHS_131910 | gcagaggaagcaaaaactgc     | ggggagggatcatctgtagagt    | 50.2           | 0.3737                |               |                      |
| TBL1XR1   | NM_024665    | 79718   | RHS4430-98526016 | V2LHS_157133 | ctggaatgcagcaggagac      | gcgctattccgaaggtcta       | 33.3           | 1                     | 33.2          | 0.895                |
| TERF1     | NM_003218    | 7013    | RHS4430-99619369 | V2LHS_153893 | ctaacagcttgccagttgagaa   | tcatttcaaaactgtgcatcaa    | 40.3           | 0.2535                |               |                      |
| TERF2     | NM_005652    | 7014    | RHS4430-99151616 | V2LHS_202445 | cccaccgttccaaccaa        | gttccactgtctttgggta       | 41.1           | 0.1441                | 40.6          | 0.76313              |
| TMLHE     | NM_018196    | 55217   | RHS4430-98894566 | V2LHS_156237 | tctgcggagttagcagtcac     | ctgctgtgtaggtgggacaa      | 13.3           | 0.5783                |               |                      |
| TOP3A     | NM_004618    | 7156    | RHS4430-98895260 | V2LHS_42272  | tttctggacatttactggtca    | tgcttcaaaaggacaagagg      | 24.2           | 0.2755                |               |                      |
| TSG101    | NM_006292    | 7251    | RHS4430-99290818 | V2LHS_56429  | tcctattcggcatctatcc      | tgctggcatgtgaggaagta      | 34.2           | 0.895                 | 34.3          | 0.7422               |
| TF2       | NM_003594    | 8458    | RHS4430-99165226 | V2LHS_32324  | agacgggttgccagagat       | caatgctctctctggtgta       | 25.1           | 0.1199                | 25.5          | 0.6552               |
| URM1      | NM_030914    | 81605   | RHS4430-98841140 | V2LHS_137618 | tgtttctaataacctgcaaacagg | agctcggcttctcaacat        | 48.4           | 0.1901                |               |                      |
| VPS16     | NM_022575    | 64601   | RHS4430-98480960 | V2LHS_74243  | ggctcagctgaggaggactca    | ccggttctggagcacttc        | 6.7            | 0.1743                | 6.2           | 0.5864               |
| XPA       | NM_000380    | 7507    | RHS4430-99330071 | V2LHS_92696  | cgagtatcgagcgaagc        | ttgggctgcttttacatt        | 44.2           | 0.0269                | 44.4          | 0.2882               |
| ZFYVE20   | NM_022340    | 64145   | RHS4430-99292164 | V2LHS_87877  | ggagccatggacactgttg      | agccttccctggcaaac         | 32.2           | 0.2124                | 32            | 1                    |
| ZFYVE20   | NM_022341    | 64145   | RHS4430-98520395 | V2LHS_87876  | ggagccatggacactgttg      | agccttccctggcaaac         | 54.3           | 0.2199                |               |                      |
| Betaactin | NM_001101    |         |                  |              | ccaaccgagagaagatga       | ccagagcgtacagggatag       |                |                       |               |                      |
